# Supplementary material for: Paraoxonase 3 is involved in the multi-drug resistance of esophageal cancer
Source: Springer Nature journal article supplement (doi:10.1186/s12935-018-0657-1), 2018-10-22
Supplement: MOESM1 [file 16217366]

## **Paraoxonase 3 is involved in the multi-drug resistance of esophageal cancer**

Dabing Huang<sup>1, 2, 3, 4\*</sup>, Yong Wang<sup>1\*</sup>, Yifu He<sup>1</sup>, Gang Wang<sup>1</sup>, Wei Wang<sup>1</sup>, Xinghua Han<sup>1</sup>, Yubei Sun<sup>1</sup>, Lin Lin<sup>1</sup>, Benjie Shan<sup>1</sup>, Guodong Shen<sup>3, 4</sup>, Min Cheng<sup>3, 4</sup>, Geng Bian<sup>2, 3, 4</sup>, Xiang Fang<sup>2, 3, 4</sup>, Shilian Hu<sup>2, 3, 4§</sup>, Yueyin Pan<sup>1§</sup>

§Co-corresponding authors.

\*Co-first authors.

### **E-mail addresses:**

DBH: [hdabing68@163.com](mailto:hdabing68@163.com)

YW: [chwangyong@126.com](mailto:chwangyong@126.com)

YFH: [heyifu@csc.org.cn](mailto:heyifu@csc.org.cn)

GW: [wanggang829@126.com](mailto:wanggang829@126.com)

WW: [wangwei20189@163.com](mailto:wangwei20189@163.com)

XHH: [hanxinghuaslyy@163.com](mailto:hanxinghuaslyy@163.com)

YBS: [sunyubeislyy@163.com](mailto:sunyubeislyy@163.com)

BJS: [danbenjie@163.com](mailto:danbenjie@163.com)

LL: [lin131521@126.com](mailto:lin131521@126.com)

GDS: [gdshen@ustc.edu.cn](mailto:gdshen@ustc.edu.cn)

MC: [chengmin@ustc.edu.cn](mailto:chengmin@ustc.edu.cn)

GB: [biangeng2018@163.com](mailto:biangeng2018@163.com)

XF: [fangxiang417@126.com](mailto:fangxiang417@126.com)

SLH: [hushilianslyy@vip.126.com](mailto:hushilianslyy@vip.126.com)

YYP: [pyyahslyy@163.com](mailto:pyyahslyy@163.com)

The full-length gels of the western analyses used in the manuscript.

**Figure 3B**

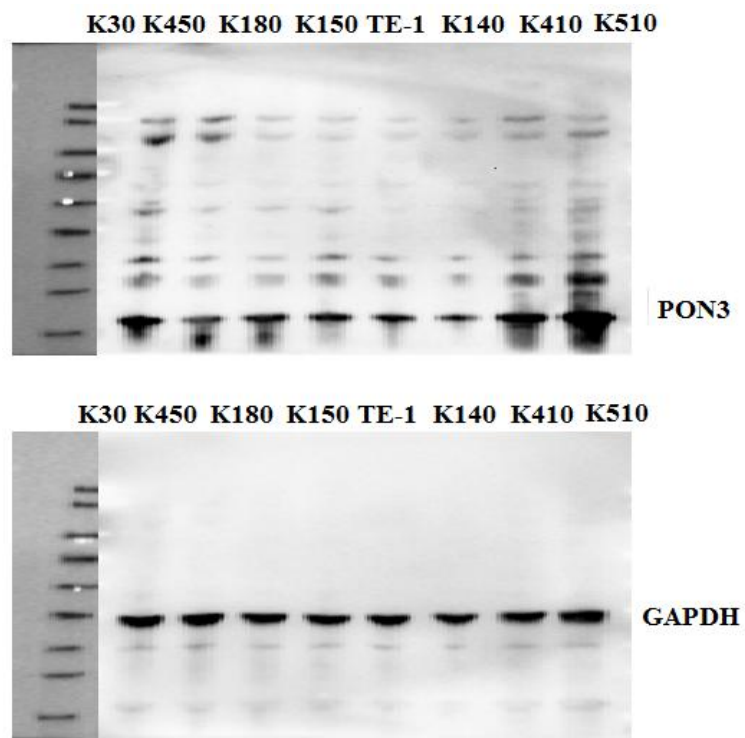

The levels of PON3 protein level determined by western blot analysis in the eight esophageal cancer cell lines

**Figure 3C**

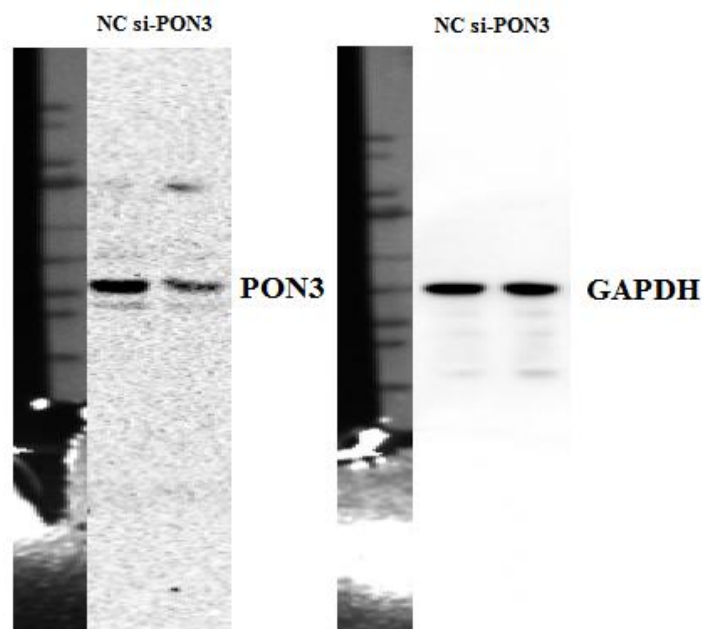

The levels of protein level (C) PON3 determined by western blot analysis in the si-PON3-transfected versus the NC-transfected K510

**Figure 4B**

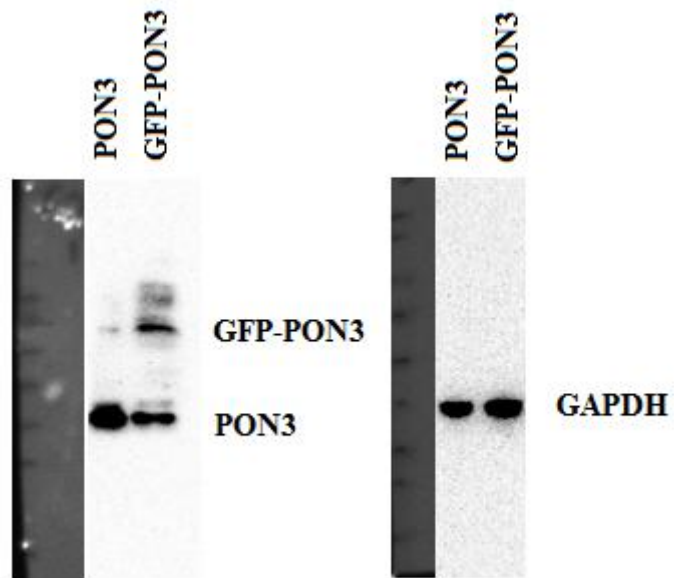

The PON3 protein level determined by western blot analysis in the GFP-tagged overexpression construct-transfected versus the NC-transfected K150
